# Supplementary material
Source: PubMed Central journal article supplement (PMC6615958)
Supplement: NIHMS1528954-supplement-1.pdf [file NIHMS1528954-supplement-1.pdf]

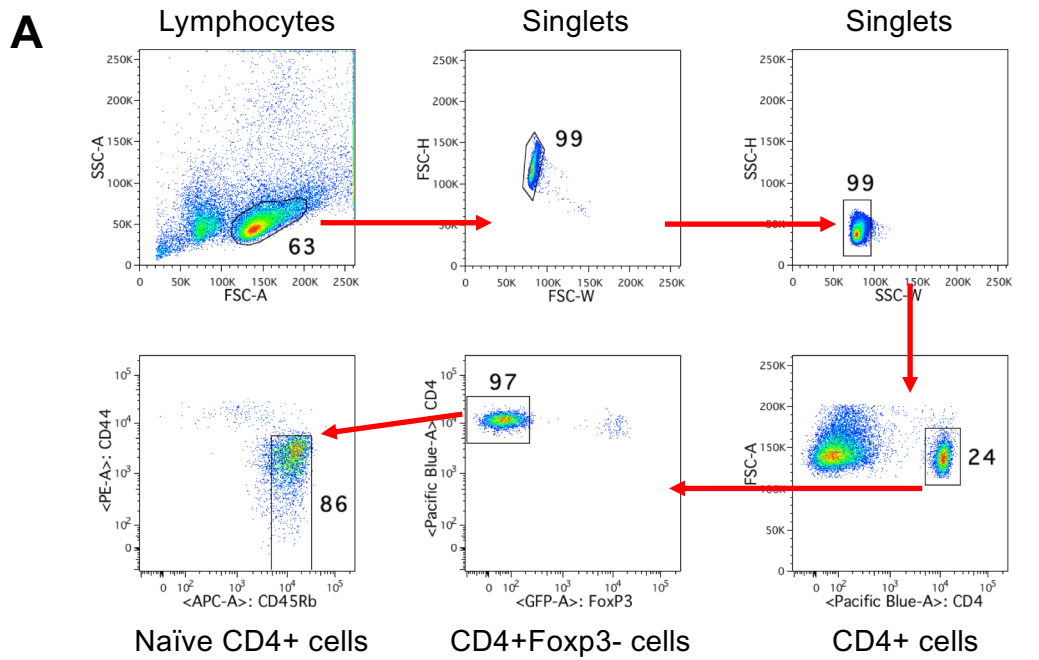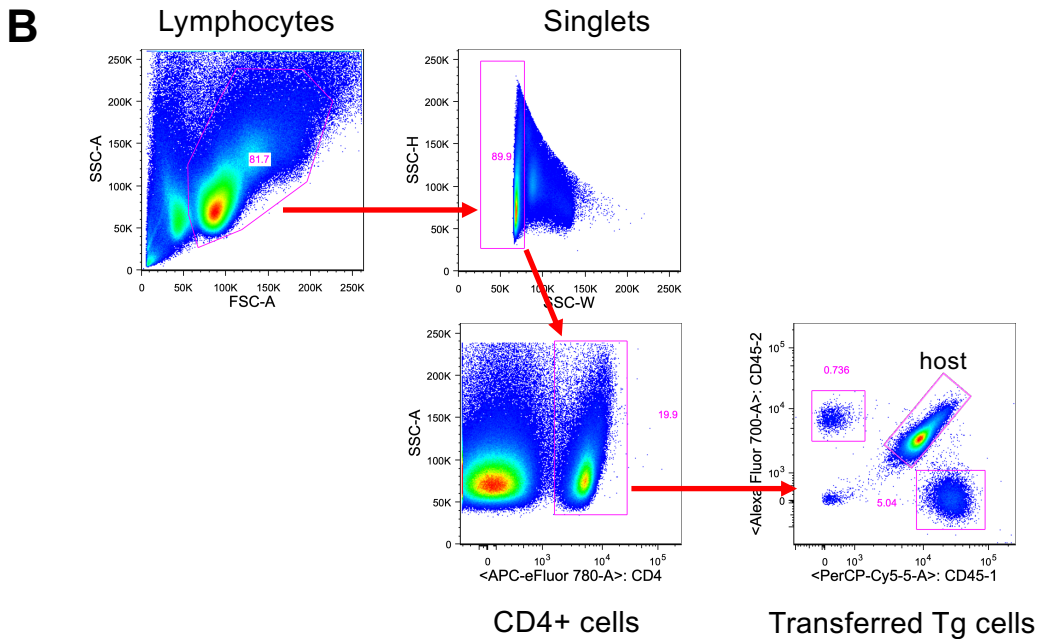

**Supplementary Figure 1. Flow cytometry gating strategies.** (A) The gating and sorting strategy for naïve CD4<sup>+</sup> T cells. (B) The gating strategy for the analysis and sorting of the transferred OTII cells (CD45.2) and/or the second OTII cells or SMARTA cells (CD45.1).
